# Supplementary material for: The Trypanosoma cruzi Antigen and Epitope Atlas: antibody specificities in Chagas disease patients across the Americas
Source: PubMed Central journal article supplement (PMC10070320; doi:10.1038/s41467-023-37522-9), 2023-04-03
Supplement: 41467_2023_37522_MOESM12_ESM.pdf [file 41467_2023_37522_MOESM12_ESM.pdf]

### **Supplementary Data 1**

**Title:** Overview of arrays used in this work

**Description:** This table shows a diagram of the microarrays used to analyse each design, CHAGASTOPE-v1 and CHAGASTOPE-v2.

### **Supplementary Data 2**

**Title:** Serum samples and pools

**Description:** This table shows a list of the human serum samples used in this study.

### **Supplementary Data 3**

**Title:** CHAGASTOPE array slides and assays

**Description:** This table shows a detailed list of the assayed arrays.

### **Supplementary Data 4**

**Title:** *T. cruzi* sequences cross-reactive with normal human serum (healthy subjects, Chagas-negative) **Description:** This table shows all the proteins where the Chagas-negative pooled serum samples reached an antigenicity signal greater than the antigenicity threshold for CHAGASTOPE-v1.

### **Supplementary Data 5**

**Title:** Best antigenic region per cluster in pooled serum samples

**Description:** This table shows a representative antigenic region with the highest seroprevalence in CHAGASTOPE-v1 for each selected cluster.

### **Supplementary Data 6**

**Title:** *T. cruzi* sequences cross-reactive with Leishmaniasis samples

**Description:** This table shows all the proteins where the Leishmania-positive pooled serum samples reached an antigenicity signal greater than the antigenicity threshold for CHAGASTOPE-v1.

### **Supplementary Data 7**

**Title:** Best antigenic region per cluster in individual serum samples

**Description:** This table shows a representative antigenic region with the highest seroprevalence in CHAGASTOPE-v2 for each selected cluster.

### **Supplementary Data 8**

**Title:** Single-residue mutational scanning results for shown epitopes

**Description:** This table shows mutagenized peaks corresponding to 232 different sequences analyzed by single mutational scanning and the resulting core residues from each.

### **Supplementary Data 9**

**Title:** Detailed single-residue mutational scanning results for all epitopes

**Description:** This table shows mutagenized peaks corresponding to all sequences analyzed by single mutational scanning and the resulting core residues.

### **Supplementary Data 10**

**Title:** Immunosorbent assays (FLISA) assay details.

**Description:** Description of CAR-Ag antigens (proteins of origin and sequences) and samples (Origin, sex, and clinical diagnosis) used in fluorescent-linked immunosorbent assays (FLISA).
